# Supplementary material
Source: PubMed Central journal article supplement (PMC4147679)
Supplement: NIHMS606659-supplement-Supplemental_Digital_Content.pdf [file NIHMS606659-supplement-Supplemental_Digital_Content.pdf]

## **Appendix. Contributing Members of the University of California Fetal Consortium**

**UC Davis:** Nina Boe, MD; Erin Brown, MD; Diana Farmer, MD; Nancy Field, MD; Laila Rhee Morris, MD; Sima Parmar, MD; Francis Poulain, MD; David Schrimmer, MD Veronique Tache, MD; Yen Truong, MD

**UC Irvine:** Tamera Hatfield, MD; Nafiz Kiciman, MD; Manuel Porto, MD; Pamela Rumney, RNC; Megan Stephenson, MD; Cherry Uy, MD; Deborah Wing, MD

**UC Los Angeles:** Kara Calkins, MD; Daniel DeUgarte, MD; Rachel Gutkin, MD; Daniel Kahn, MD, PhD; Melanie Maykin; Aisling Murphy, MD; Tina Nguyen, MD; Gary Satou, MD; Stephen Shew, MD

**UC San Diego:** Tracy Anton, RDMS; Jerasimos Ballas, MD, MPH; Stephen Bickler, MD; Andrew Hull, MD; Gina James, RDMS; Jae Kim, MD; Karen Kling, MD; Louise Laurent, MD; Rachael Overcash, MD, MPH; Kate Pettit, MD; Dolores Pretorius, MD; Gladys Ramos, MD;

**UC San Francisco:** Kathryn Archbold; Jody Farrell, RN, MSN; Vickie Feldstein, MD; Ruth Goldstein, MD; Angie Jelin, MD; Roberta Keller, MD; Hanmin Lee, MD; Leslie Lusk, MD; Tippi MacKenzie, MD; Anita Moon-Grady, MD; Mary Norton, MD; Allison O'Leary, MPH; Larry Rand, MD

Overcash RT, DeUgarte DA, Stephenson ML, Gutkin RM, Norton ME, Parmar S, et al. Factors associated with gastroschisis outcomes. *Obstet Gynecol* 2014;124.

The authors provided this information as a supplement to their article.

© Copyright 2014 American College of Obstetricians and Gynecologists.

Page 1 of 1
